# Supplementary material
Source: Elsevier journal article supplement (https://www.sciencedirect.com/science/article/pii/S0301054617301052)
Supplement: mmc1 [file S0301054617301052:mmc1.doc]

| Level of evidence as defined in BTS 2016{BTS 2016} | |
| --- | --- |
| **1++** | High quality meta-analyses, systematic reviews of RCTs, or RCTs with a very low risk of bias |
| **1+** | Well conducted meta-analyses, systematic reviews, or RCTs with a low risk of bias |
| **1-** | Meta-analyses, systematic reviews, or RCTs with a high risk of bias |
| **2++** | High quality systematic reviews of case control or cohort studies  High quality case control or cohort studies with a very low risk of confounding or bias and a high probability that the relationship is causal |
| **2+** | Well conducted case control or cohort studies with a low risk of confounding or bias and a moderate probability that the relationship is causal |
| **2-** | Case control or cohort studies with a high risk of confounding or bias and a significant risk that the relationship is not causal |
| **3** | Non-analytic studies, e.g. case reports, case series |
| **4** | Expert opinion |
| **GRADES OF RECOMMENDATION**  *Note: The grade of recommendation relates to the strength of the evidence on which the recommendation is based. It does not reflect the clinical importance of the recommendation.* | |
| **A** | At least one meta-analysis, systematic review, or RCT rated as 1++,  and directly applicable to the target population; or  A body of evidence consisting principally of studies rated as 1+,  directly applicable to the target population, and demonstrating overall consistency of results |
| **B** | A body of evidence including studies rated as 2++,  directly applicable to the target population, and demonstrating overall consistency of results; or  Extrapolated evidence from studies rated as 1++ or 1+ |
| **C** | A body of evidence including studies rated as 2+,  directly applicable to the target population and demonstrating overall consistency of results; or  Extrapolated evidence from studies rated as 2++ |
| **D** | Evidence level 3 or 4; or  Extrapolated evidence from studies rated as 2+ |
| GOOD PRACTICE POINTS | |
| ✔ | Recommended best practice based on the clinical experience of the guideline development group |

| Level of evidence as defined in GINA 2015{GINA 2015} | | |
| --- | --- | --- |
| **Evidence level** | **Sources of evidence** | **Definition** |
| **A** | Randomized controlled trials (RCTs) and meta-analyses.  Rich body of data. | Evidence is from endpoints of well-designed RCTs or meta-analyses that provide a consistent pattern of findings in the population for which the recommendation is made. Category A requires substantial numbers of studies involving substantial numbers of participants. |
| **B** | Randomised controlled trials (RCTs) and meta-analyses.  Rich body of data. | Evidence is from endpoints of intervention studies that include only a limited number of patients, post hoc or subgroup analysis of RCTs or meta-analysis of such RCTs. In general, Category B pertains when few randomised trials exist, they are small in size, they were undertaken in a population that differs from the target population of the recommendation, or the results are somewhat inconsistent. |
| **C** | Non-randomised trials.  Observational studies. | Evidence is from outcomes of uncontrolled or non-randomised trials or from observational studies |
| **D** | Panel consensus judgment. | This category is used only in cases where the provision of some guidance was deemed valuable but the clinical literature addressing the subject was insufficient to justify placement in one of the other categories. The Panel Consensus is based on clinical experience or knowledge that does not meet the above listed criteria. |

| Level of evidence as defined in GEMA 2015{GEMA 2015} | |
| --- | --- |
| **A** | SR of RCT with or without meta-analysis, with low risk of bias. The evidence comes from a substantial number of well-designed studies with consistent results. |
| **B** | SR of RCT with or without meta-analysis, with moderate risk of bias. The evidence comes from a limited number of studies and/or the results show inconsistency. |
| **C** | The evidence comes from trials that lack randomisation, that are observational or non-controlled. |
| **D** | Clinical experience or scientific literature that cannot be included under C. |

RCT = randomised controlled trials, SR = systematic reviews.

| Prevention | | | | |
| --- | --- | --- | --- | --- |
| Clinical questions | GUIMA proposed answer Yes/No | Evidence from Mother guidelines | | |
| BTS | GINA | GEMA |
| P1. For non-allergic people:  Does the ownership of cats or dogs modify the prevalence of asthma? | Animals: no reduction  GEMA: Cat exposure: protects | 2++, p48 | B, p. 106 | B-C, pag. 27, Table 1-2 |
| Does mite exposure modify the development of asthma? | Intradomiciliary allergens: multifaceted interventions do reduce | x | 1-, A, p. 106 | xx |
| P2. For non-allergic children: Does vaccination affect the prevalence of asthma?  INCLUDE: BCG, whooping cough, measles vaccinations | No | 2+, B, p51 | x | xx |
| In premature infants: palivizumab (anti-VSR) | Reduces wheezing | x | B, p 108 |
| P3. For non-allergic people: A change in environment affects the prevalence of asthma …  INCLUDE: change in altitude, shift from urban to rural environment, conditions of the home environment –especially humidity, ventilation- | Yes, BTS: Insufficient evidence  GINA: rural environment with exposure to microorganisms reduces | 3-4, p53 |  | xx |
| P4. For non-allergic children: Does exposure to environmental tobacco smoke increase the likelihood of asthma? | Yes | 2+, B, p51 | A, p. 107 | 1-, B-C, pag. 27, Table 1-2 |
| P5. In children and adults: Does smoking increase the incidence of asthma? | Yes | 3, B, p53 (adolescents) |  | B-C, pag. 27, Table 1-2 |
| P6. For non-allergic people: Does a healthy diet ('Mediterranean diet', diet rich in antioxidants, vit D + E, etc.) reduce the prevalence of asthma? | May be yes (antioxidants, selenium, lipids)  Vit D+E in pregnancy | C | C, p. 106 | B-C, Mediterranean diet reduces. pag 27, Table 1-2 |
| P7. For non-allergic people: Does a hypoallergenic diet of the pregnant or lactating mother reduce the incidence of asthma in her child? | No | 1+, A, p49 | x | x |
| P8. In infants: Does breastfeeding reduce the prevalence of wheezing or asthma? | Yes  (GINA: No, but yes against wheezing) | B, p49 | No, D.  Yes, reduces wheezing. Recommendable, A p.106 | A-B, pag. 27, Table 1-2 |
| P9A. In the general paediatric population:  A. Can any medication prevent the development of asthma? (Primary prevention) | No  [ARIA: antihistamines do NOT prevent] | No data | No p107, probiotics 1+ |  |
| P9B. Does the frequent intake of paracetamol (PCM) or broad-spectrum antibiotics (BSAB) between 0-12 months of age favour the development of asthma? | Yes | x | 1-, B, p 108 | Antibiotics: 1-  Paracetamol: 1+, B-C, pag27 |

| When to suspect the diagnosis of asthma | | | | |
| --- | --- | --- | --- | --- |
| Clinical Question | Proposed reply | Evidence in mother guidelines | | |
| BTS | GINA | GEMA |
| Note: Asthma is a heterogeneous entity, with a mostly clinical diagnosis. Thus, no strong evidence-based recommendations, related to its diagnosis, can be made. | Yes | p.11 | p.5 | C, p.33 |
| D2. In patients ≥ 6 years: The diagnosis of asthma is based on three points?  I. Presence of more than one of the clue symptoms:   1. wheeze 2. cough 3. dyspnoea 4. chest tightness   II. + Variability of symptoms  III. + Variable airflow obstruction. | Yes | 2 or more p. 22 | Adults: generally more than one  p. 5 | C, p.33 (does not mention how many) |
| D3. In patients ≥ 6 years, for the diagnosis of asthma: A clue characteristic of the respiratory symptoms is their variability?   1. Come and go with time 2. Fluctuation in intensity 3. Worse in the night/past midnight/on awakening 4. Exacerbate with exercise, laughing, contact with allergens, cold air 5. Exacerbate with viral illnesses 6. Exacerbate with the ingestion of NSAIDs or beta-blocking agents (BTS) | Yes | p.23 | p.5, table | p.33 (not very complete) |
| D4. Airway hyper-reactivity and inflammation are secondary characteristics of asthma? | Yes | p.11 |  |  |
| D5. In patients ≥ 6 years presenting with the respiratory symptoms described above: are there any specific clinical details in the personal or family history that can increase or decrease the probability of the diagnosis of asthma? | Yes | P. 23 | p.3 y box p.5 | p.33, not clear |
| THE PROBABILITY OF ASTHMA IS INCREASED IF:   - Personal history of atopy (AD, AR) - Family history of atopy or asthma - Diffuse wheeze on auscultation - Reduced FEV1 or PEF with no other explanation (serial or historic values) - Eosinophilia with no other explanation   THE PROBABILITY OF ASTHMA IS DECREASED IF:   - Cough as an isolated symptom - Chronic productive cough, with no wheeze nor dyspnoea - Repetitively normal physical exam of the chest while symptomatic - Dysphonia - Symptoms only with colds - Smoking history of importance (e.g. > 20 pack-years) - Cardiac pathology - Dyspnoea accompanied by light-headedness, dizziness or paraesthesia - Exercise-induced dyspnoea with noisy inspiration. - Normal FEV1 or PEF when symptomatic* |  | P. 23 | p.3 | p.33, not clear |
| D6. In patients ≥ 6 years with respiratory symptoms suggestive of asthma: The absence of wheezing discards asthma? | No | p.11, p.23, box 1st row | p.3 & box on p.5 | x |
| D7. In patients ≤ 5 years: Might making the diagnosis of asthma be a challenge?  Because:   - Respiratory symptoms (sporadic cough and wheezing) are common during viral respiratory infections in children without asthma, particularly in the 0-2-year-old - Routine tests to demonstrate airflow obstruction are lacking | Yes | p.11 | p.99  GINA 2015 |  |
| D8. In patients ≤ 5 years: One suspects the diagnosis of asthma if…?  More than one of the clue respiratory symptoms are present, periodically or recurrently, varying in intensity and frequency:   1. wheeze 2. cough 3. dyspnoea 4. chest tightness. | Yes | [p11] | p.99 | C [p. 33] |
| D9. For preschool children, with more than three wheezing episodes per year during the first 3 years of life: is the asthma predictive index a valuable tool to predict the risk of persistent asthma? | Yes | p. 12  2++ (Ref. #14) | GINA, castro = ref.10 | Table  p. 37 |
| D10. According to the age-group and the acute of chronic presentation of the respiratory symptoms, should differential diagnoses be considered?  **See table below for differential diagnoses in children**. | Yes | [p. 26] | p. 8 | C [p. 34] |
| D11. Does a personal or family history of allergy increase the predisposition or the severity of asthma? | Yes | 2++ [p. 13] |  | C [p. 33] |

Important points to consider in ≤ 5 years: (GINA)

- Asthma starts in early infancy in more than 50% of the cases

- Atopy is present in the majority of children with asthma > 3 years of age

- Allergic sensitisation is one of the most important risk factors for the development of asthma

Table. Probabilities of asthma differential diagnosis

| Children < 18 years |
| --- |
| **Diseases of the upper respiratory tract**   - Allergic rhinitis and sinusitis (GEMA “C” pp39) (GINA pp8,89) - Chronic upper airway cough syndrome (postnasal drip) (GINA pp8)   **Upper airway obstructions**   - Inhaled foreign body (BTS pp14) (GEMA “C” pp118) (GINA pp8,89) - Central airway obstruction / compression (GEMA “C” pp118) - Laryngeal disorders (including "vocal cord dysfunction") (BTS pp14) (GEMA “D” pp118) (GINA pp8) - Congenital malformations, including vascular rings (BTS pp14) (GEMA “C” pp118) (GINA pp89) - Laryngotracheomalacia, tracheal stenosis, bronchostenosis (BTS pp14) (GEMA “C” pp118) (GINA pp89) - Tracheobroncomalacia acquired (recurrent polychondritis, idiopathic) (GEMA “D” pp113) - Lymphadenopathy (GEMA “C” pp118) - Carcinoid tumour or other (GEMA “C” pp118) - Mediastinal mass / lymphoid node (GEMA “C” pp118)   **Diseases of the lower airways**   - Viral bronchiolitis (BTS pp14) (GEMA “C” pp39,118) (GINA pp8) - Bronquiolitis obliterante (BTS pp14) (GEMA “C” pp39,118) (GINA pp8) - Eosinophilic bronchitis (GEMA “C” pp113) - Bronchiectasis (BTS pp14) (GEMA “C” pp39,118) (GINA pp8,76) - Cystic fibrosis (BTS pp14) (GEMA “C” pp39, 118) (GINA pp8,89) - Bronchopulmonary dysplasia (GEMA “C” pp118) (GINA pp8,89) - Congenital heart disease (GEMA “C” pp39,118) (GINA pp8,89,76) (BTS pp100) - Primary ciliary dyskinesia (GEMA “C” pp39,118) (BTS pp14) (GINA pp89) - Interstitial lung disease (GEMA “C” pp118) (GINA pp76) - Lung infection (GEMA “D” pp113) (BTS pp100) (GINA pp89) - Pulmonary infiltrates with eosinophilia (GEMA “D” pp113) - Churg-Strauss syndrome and other pulmonary vasculitis (GEMA “D” pp113) - Aspiration pneumonitis (BTS pp100) - Tuberculosis (BTS pp14) (GINA pp11,89) - Congenital lobar emphysema (GINA pp87)   **Other causes**   - Hyperventilation (GEMA “D” pp35) (GINA pp8,89) - GERD (BTS pp14) (GEMA “C” pp118) (GINA pp89) - Swallowing disorders (GEMA “C” pp39,118) - Congenital or acquired immunodeficiency (GEMA “C” pp118) (GINA pp89) (BTS pp14) - Prematurity and related diseases (GEMA “C” pp39,118) (BTS pp14) - Connective tissue diseases (GEMA “C” pp118) - Obesity (GEMA “C” pp112) (GINA pp3) - Heart failure (GEMA “D” pp113) (GINA pp66) - Alpha-1 antitrypsin deficiency (GINA pp8) |

GINA: Global Initiative for Asthma [2015]

GEMA: Guía Española para el manejo del Asma [2015]

BTS: British Thoracic Society guidelines [2014]

| Asthma diagnosis: tests that confirm the diagnosis* | | | | |
| --- | --- | --- | --- | --- |
| Clinical Question | Proposed reply | Evidence in mother guidelines | | |
| BTS | GINA | GEMA |
| D12-6. Is pre- and post-bronchodilator spirometry the first-choice diagnostic test to document variable expiratory airflow obstruction? Does it have an adequate diagnostic precision? |  |  |  |  |
| Children < 2 years | No | 2+ [p. 16] | No information | C [p. 40] |
| Children 2-5 years (FEV0.5 >12% personal best/ predicted) | No | 2+ [p. 17] | p. 7 | D [p. 41] |
| Children > 6 years (FEV1 >12% personal best/predicted) | Yes | 2+ [p. 16] | p. 7 | C [p. 37] |
| D13-6a. In patients ≥ 6 years with respiratory symptoms suggestive of asthma: Do normal spirometric values, when the patient is asymptomatic, discard asthma? | No, serial pulmonary function testing is recommended, as it shows more, than one test. | 2+ p.16, p.22 | p.3, box on p.5 and p.22 | Does not apply |
| D14-7. Is it possible to use complementary objective tests to confirm the variable limitation of airflow? | Mostly Yes | 2+ [p. 16] | (p. 7) | C [p. 39] |
| **7a. Increase in diurnal variability of PEF during a period of 2 weeks (amplitude % mean)**  Children < 2 years | No | 3.1.6 [p. 17] | p. 5 | Does not apply |
| Children 2-5 years | Mostly No | 2+ [p. 17] | p. 5 | Does not apply |
| Children > 6 years  * Cut-points: GEMA ≥ 20%  ‡ BTS ≥ 12% | Yes,  PEF variability ≥ 12%)* ‡ | 2+ [p. 16] | p. 5 | C [p. 40] |
| **7b. Increase in FEV1 >12% after 4-6 weeks of a therapeutic trial with moderate-high ICS***  Children < 2 years | No | 3.1.8 [p. 18] | No information | D [p. 41] |
| Children 2-5 years | Mostly No | 3.1.8 [p. 18] | No information | D [40] [FEV0.5] |
| Children > 6 years  ** *Each guideline uses a different schedule:*  - BTS: beclomethasone IDM 400 mcg/d for 6-8 weeks  - GINA: 4 weeks of “controller treatment”  - GEMA: 2-3 weeks fluticasone with IDM 1500-2000 mcg/d. | Yes | 2+ [p. 16] | [p. 5] | C [p. 38] |
| **7c. Increase in FEV1 >12% after a therapeutic trial with prednisone 30 mg/day PO for 15 days ***  Children < 2 years | No | p. 16 | No information | D [p. 41] |
| Children 2-5 years | No | 3.1.6 [p. 17] | Does not apply | D [40] [FEV0.5] |
| Children > 6 years  ** *Each guideline uses a different schedule:*  - BTS: Prednisone 30 mg/day for 15 days  - GINA: 4 weeks of “controller treatment”  - GEMA: 2-3 weeks of prednisone 40 mg/day | Yes | 2+ [p. 16] | [p. 5] | C [p. 38] |
| D15-8. In patients in whom asthma is suspected, but who have normal pulmonary function tests: Should bronchial hyper-reactivity be identified with challenge testing? | Mostly yes | 3 [p. 16] | [p. 5] | C [p. 39] |
| **Challenge testing with exercise?**  Children < 2 years | No | 3.1.8 [p. 18] | [p. 5] | D [p. 40] |
| Children 2-5 years | Mostly no | 3.1.8 [p. 18] | [p. 5] | D [p. 41] |
| Children > 6 years (fall FEV1>12% predicted)****  **** GEMA: fall >20% from basal | Mostly yes | C [pp17] | [p. 5] | C [p. 40] |
| **Direct challenge testing (Methacholine, histamine)?**  Children < 2 years | No | 3.1.8 [p. 18] | [p. 5] | C [p. 40] |
| Children 2-5 years | No | 3.1.8 [p. 18] | [p. 5] | C [p. 40] |
| Children > 6 years | Mostly no | 3.1.8 [p. 18] | [p. 5] | C [p. 40] |
| **Indirect challenge testing (Hypertonic saline, mannitol)?**  Children < 2 years | No | 3.1.8 [p. 18] | [p. 5] | C [p. 40] |
| Children 2-5 years | No | 3.1.8 [p. 18] | [p. 5] | C [p. 40] |
| Children > 6 years | Mostly no | 3.1.8 [p. 18] | [p. 5] | C [p. 40] |
| D16-9. In patients in whom asthma is suspected and who show airflow obstruction in PFT, however who have no reversibility after bronchodilator and with negative tests for bronchial hyperreactivity:  Should FeNO testing be considered a useful tool?  Children < 2 years | No | 2++ [p. 18] | [p. 8] | D [p. 41] |
| Children 2-5 years | No | 2++ [p. 18] | [p. 8] | D [p. 41] |
| Children > 6 years | Mostly no | 2++ [p. 18] | [p. 8] | C [p. 41] |
| D17-10. In patients with asthma symptoms after allergen exposure: Should atopic sensitisation be demonstrated (with skin prick tests and/or specific IgE testing in serum)? | Yes | 2++ [p. 19, 26] | (p. 7) | B [p. 43] |
| D18-11. When asthma is suspected in a child: Should a chest X-ray be taken for the diagnosis? | Mostly no (only in severe cases to rule out differential diagnoses) | [p. 26] | No information | D [p. 119] |

Note:
- The diagnosis of allergic asthma will be based on the concordance between the medical history and the diagnostic test results.

- Estimates of sensitivity and specificity of complementary tests in adults with normal or near-normal spirometric values: see table 7 BTS.

| Diagnosis: to establish asthma severity and level of control*** | | | | |
| --- | --- | --- | --- | --- |
| D19. In general: In Children ≥ 6 years, for home monitoring of disease activity and asthma control we can use…  a. Asthma control test (ACT)?  b. peak flow measurements?  c. Spirometry?  d. Impulse oscillometry?  e. Exhaled nitric oxide?  f. Sputum eosinophils?  g. Bronchial challenge to detect hyper-reactivity (Methacholine etc.)?  h. Metabolites in urine (LT4, PCE)? | Yes  Yes  No  No  No  No  No  No  No | [p. 31]  [p. 32] | (p. 15,19 ,20) | C [p. 49]  C [p. 51] |
| We suggest strengthening awareness, that there are simple, objective methods to measure control, that can be applied at home and that there are other ones that can be accessed at all levels of care | | | | |
| D20-18 At the **first** and **second** level of health care:  In patients ≥ 6 years with asthma, as out-patient monitoring of disease activity and asthma control can we use:  a. Asthma control test (ACT)?  b. peak flow measurements?  c. Spirometry?  d. Impulse oscillometry?  e. Exhaled nitric oxide?  f. Sputum eosinophils?  g. Bronchial challenge to detect hyper-reactivity (Methacholine etc.)?  h. Metabolites in urine (LT4, PCE)? | Yes  Yes  Yes  No  No  No  No  No  No | 1st level ACT [p. 31)  2nd level: ACT: p. 15 [p. 31]  [p. 35]  FeNO (p. 36)  Spirometry PEF (p. 33) | (p. 19,20) | D [p. 49]  2nd level:  C [p. 52]  C [p. 49] |
| In order to emphasize other effective methods, which may be available at the 2nd level, accessible and not excessively expensive, and which are objective | | | | |
| D20-At the **third** level of health care:  In patients ≥ 6 years with asthma, as out-patient monitoring of disease activity and asthma control can we use:  a. Asthma control test (ACT)?  b. peak flow measurements?  c. Spirometry?  d. Impulse oscillometry?  e. Exhaled nitric oxide?  f. Sputum eosinophils?  g. Bronchial challenge to detect hyper-reactivity (Methacholine etc.)?  h. Metabolites in urine (LT4, PCE)? | Yes  Yes  Yes  Yes  Yes  Yes  Yes  Yes | FeNo (p. 36)  Spirometry PEF (p. 33)  Methacholine challenge (p. 36) | FeNo  (p. 26, 35 ) A | PEF (p. 40) C  FEV1 (p. 40, 41) D  FeNO (p. 41) D  IOS (p. 41) D |
| There are other more specialised studies, however also the basic ones, used in primary care, can be equally useful. | | | | |
| D22-19.- Patients ≥ 6 years with asthma are considered well controlled if in the last 4 weeks, they have had:   - < 2 times / week symptoms - No night-time wakening - < 2 times / week use of rescue inhaler - No self-limiting of physical activities, due to asthma | Yes | Not mentioned | (p. 17) | D (p. 46, 47) |
| In the guidelines, they mention these factors as measures of control, to guide treatment adjustments; they are simple, practical and easy to remember | | | | |
| D23-19 In patients ≥ 6 years with asthma: What factors increase the risk of developing exacerbations?   - Use of more than one SABA vial per month - Inadequate use of the inhaled steroid (poor adherence, poor inhalation technique) - Low FEV1 (especially if <60%) - Psychosocial or socioeconomic problems - Comorbidities - Pregnancy - Eosinophilia in expectoration - Eosinophilia in peripheral blood |  | Not mentioned | (pp17) | D (p. 47) |
| They also serve to identify when a patient is at risk of having an exacerbation and that the doctor can make changes according to the situation | | | | |
